# Supplementary material
Source: Springer Nature journal article supplement (https://www.springermedizin.de/resource/supplementary/12958_2009_600_MOESM3_ESM.pdf/9568066)

**A**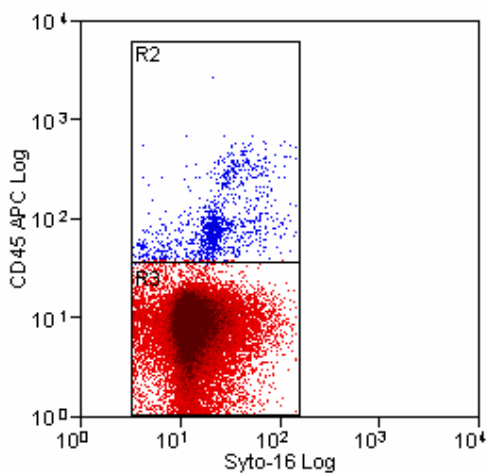**B**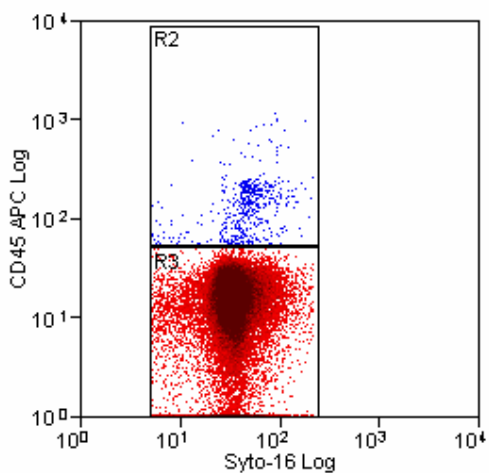**C**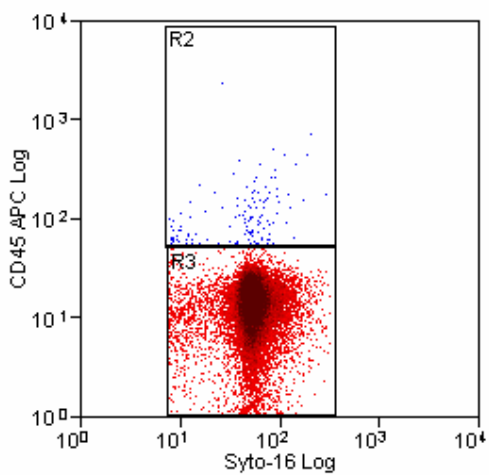

Supplement: MOESM3 [file 9568066]
